# Supplementary material
Source: PubMed Central journal article supplement (PMC3255129)
Supplement: supp_110524_editorial-smart-1-at.pdf [file supp_110524_editorial-smart-1-at.pdf]

## Appendix 1: References

1. Wu RC, Morra D, Quan S, et al. The use of smartphones for clinical communication on internal medicine wards. *J Hosp Med* 2010;5:553-9.
2. Hennessy-Fiske M. When Facebook goes to the hospital, patients may suffer. *Los Angeles Times* 2010 Aug. 8. Available: <http://articles.latimes.com/2010/aug/08/local/la-me-facebook-20100809> (accessed 2011 Mar. 03).
3. Abenstein JP. Safety while swimming in a sea of energy. *Mayo Clin Proc* 2007;82:276-8.
4. van Lieshout EJ, van der Veer SN, Hensbroek R, et al. Interference by new-generation mobile phones on critical care medical equipment. *Crit Care* 2007;11:R98.
5. Baranchuk A, Kang J, Shaw C, et al. Electromagnetic interference of communication devices on ECG machines. *Clin Cardiol* 2009;32:588-92.
6. *Using mobile phones in NHS hospitals*. London (UK): Department of Health; 2009. Available: [www.dh.gov.uk/en/Publicationsandstatistics/Publications/PublicationsPolicyAndGuidance/DH\\_092811](http://www.dh.gov.uk/en/Publicationsandstatistics/Publications/PublicationsPolicyAndGuidance/DH_092811) (accessed 2011 Mar. 28).

Appendix to: Rosenfield D, Hébert PC, Stanbrook MB, et al. Being smarter with smartphones. *CMAJ* 2011.  
DOI: 10.1503/cmaj.110524.

Copyright © 2011 Canadian Medical Association and its licensors
